# Supplementary material for: The DEAD-box RNA helicase Ded1 has a role in the translational response to TORC1 inhibition
Source: PubMed Central journal article supplement — Mol Biol Cell. 2019 Aug 1;30(17):2171–84. doi: 10.1091/mbc.E18-11-0702 (PMC6743465; doi:10.1091/mbc.e18-11-0702), 2019-08-01
Supplement: mbc-30-2171-s001.pdf [file mbc-30-2171-s001.pdf]

# Supplemental Materials

*Molecular Biology of the Cell*

Aryanpur et al.

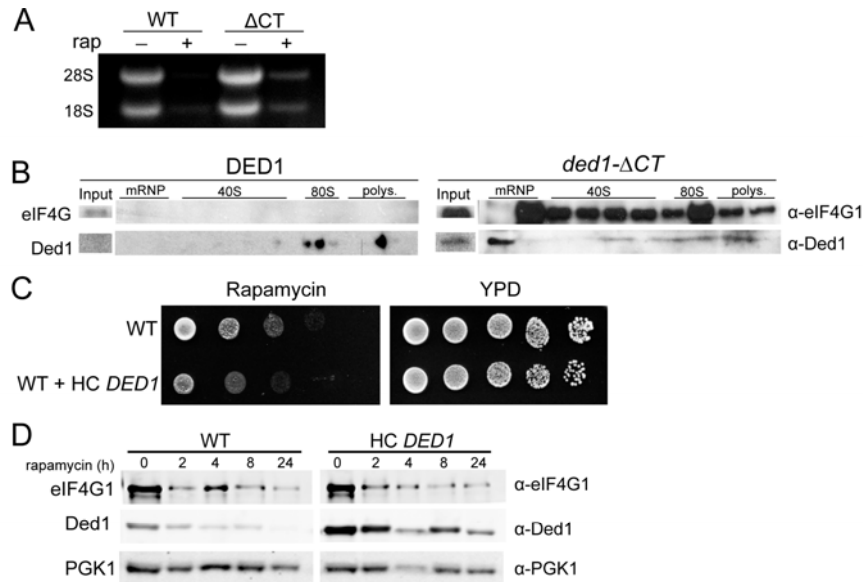

**Supplementary Figure S1:**

(A) *DED1* or *ded1*- $\Delta$ CT cells were treated with rapamycin for 18 hours, RNA extraction was performed, and 18S and 28S ribosomal RNA was analyzed by gel electrophoresis. (B) *DED1* and *ded1*- $\Delta$ CT cells were grown in the presence of rapamycin for 18 hours. Polysome profiles were generated by subjecting cell lysates to 7.5–30% sucrose density centrifugation and OD254 analysis. Fractions were collected for western blotting using antibodies against *TIF4631* (eIF4G1) and Ded1. (C) Wild-type cells with an empty vector (WT), or cells containing high-copy (2 $\mu$ ) plasmid with *DED1* (WT + HC-*DED1*) were serially diluted and plated on selective media +/- rapamycin (100 ng/ml), and incubated at 30°C. (D) WT + vector or WT + HC-*DED1* cells were subjected to a time course of rapamycin treatment, and cell extracts were prepared and blotted for the indicated translation initiation factors (and PGK1 as a loading control) as in Figure 5.



|         |                                                                                                                       |      |                       |
|---------|-----------------------------------------------------------------------------------------------------------------------|------|-----------------------|
|         | <i>ade2-1 ura3-1 his3-11,15 leu2-3,112 trp1-1 can1-100 +pCEN/LEU2/ded1-ΔCT</i>                                        |      |                       |
| TBY120  | <i>MAT<sup>ded1</sup>::KAN TIF1:3XHA:TRP1 ade2-1 ura3-1 his3-11,15 leu2-3,112 trp1-1 can1-100 +pCEN/HIS3/DED1</i>     | W303 | This study            |
| TBY131  | <i>MAT<sup>ded1</sup>::KAN TIF1:3XHA:TRP1 ade2-1 ura3-1 his3-11,15 leu2-3,112 trp1-1 can1-100 +pCEN/HIS3/ded1-ΔCT</i> | W303 | This study            |
| SWY4277 | <i>MAT<sup>ded1</sup>::KAN ade2-1 ura3-1 his3-11,15 leu2-3,112 trp1-1 can1-100 +pCEN/LEU2/ded1-120</i>                | W303 | Bolger and Went, 2011 |
| TBY52   | <i>MAT<sup>ded1</sup>::KAN ade2-1 ura3-1 his3-11,15 leu2-3,112 trp1-1 can1-100 +pCEN/LEU2/DED1</i>                    | W303 | This study            |
| TBY121  | <i>MAT<sup>ded1</sup>::KAN ade2-1 ura3-1 his3-11,15 leu2-3,112 trp1-1 can1-100 +pCEN/LEU2/ded1-ΔCT</i>                | W303 | This study            |
| TBY104  | <i>MAT<sup>ded1</sup>::KAN ade2-1 ura3-1 his3-11,15 leu2-3,112 trp1-1 can1-100 +pCEN/LEU2/ded1-Δ535-548</i>           | W303 | This study            |
| TBY105  | <i>MAT<sup>ded1</sup>::KAN ade2-1 ura3-1 his3-11,15 leu2-3,112 trp1-1 can1-100 +pCEN/LEU2/ded1-Δ549-562</i>           | W303 | This study            |
| TBY106  | <i>MAT<sup>ded1</sup>::KAN ade2-1 ura3-1 his3-11,15 leu2-3,112 trp1-1 can1-100 +pCEN/LEU2/ded1-Δ563-576</i>           | W303 | This study            |
| TBY107  | <i>MAT<sup>ded1</sup>::KAN ade2-1 ura3-1 his3-11,15 leu2-3,112 trp1-1 can1-100 +pCEN/LEU2/ded1-Δ577-590</i>           | W303 | This study            |
| TBY108  | <i>MAT<sup>ded1</sup>::KAN ade2-1 ura3-1 his3-11,15 leu2-3,112 trp1-1 can1-100 +pCEN/LEU2/ded1-Δ591-604</i>           | W303 | This study            |
| TBY110  | <i>MAT<sup>ded1</sup>::KAN ade2-1 ura3-1 his3-11,15 leu2-3,112 trp1-1 can1-100 +pCEN/HIS3/ded1-W604A</i>              | W303 | This study            |
| TBY111  | <i>MAT<sup>ded1</sup>::KAN ade2-1 ura3-1 his3-11,15 leu2-3,112 trp1-1 can1-100 +pCEN/HIS3/ded1-W603/604A</i>          | W303 | This study            |
| TBY132  | <i>MAT<sup>ded1</sup>::KAN ade2-1 ura3-1 his3-11,15 leu2-3,112 trp1-1 can1-100 +pCEN/LEU2/ded1-4SA</i>                | W303 | This study            |
| TBY114  | <i>MAT<sup>ded1</sup>::KAN ade2-1 ura3-1 his3-11,15 leu2-3,112 trp1-1 can1-100 +pCEN/LEU2/ded1-4SD</i>                | W303 | This study            |
| TBY101  | <i>MAT<sup>ded1</sup>::KAN SCH9:3XHA:TRP1 ade2-1 ura3-1 his3-11,15 leu2-3,112 trp1-1 can1-100 +pCEN/HIS3/DED1</i>     | W303 | This study            |
| TBY103  | <i>MAT<sup>ded1</sup>::KAN SCH9:3XHA:TRP1 ade2-</i>                                                                   | W303 | This study            |

|        |                                                                                                                  |      |            |
|--------|------------------------------------------------------------------------------------------------------------------|------|------------|
|        | <i>1 ura3-1 his3-11,15 leu2-3,112 trp1-1 can1-100 +pCEN/HIS3/ded1-ΔCT</i>                                        |      |            |
| TBY133 | <i>MATα ade2-1 ura3-1 his3-11,15 leu2-3,112 trp1-1 can1-100 +2μ/URA3/DED1</i>                                    | W303 | This study |
| TBY134 | <i>MATα tif4631::HYG ded1::KAN ade2-1 ura3-1 his3-11,15 leu2-3,112 trp1-1 can1-100 +pCEN/HIS3/DED1</i>           | W303 | This study |
| TBY135 | <i>MATα tif4631::HYG ded1::KAN ade2-1 ura3-1 his3-11,15 leu2-3,112 trp1-1 can1-100 +pCEN/HIS3/ded1-ΔCT</i>       | W303 | This study |
| TBY136 | <i>MATα tif4631::HYG ded1::KAN ade2-1 ura3-1 his3-11,15 leu2-3,112 trp1-1 can1-100 +pCEN/HIS3/ded1-Δ591-604</i>  | W303 | This study |
| TBY137 | <i>MATα tif4631::HYG ded1::KAN ade2-1 ura3-1 his3-11,15 leu2-3,112 trp1-1 can1-100 +pCEN/HIS3/ded1-W603/604A</i> | W303 | This study |

**Supplemental Table S2:** Plasmids used in this study

| Plasmid Name    | Description                    | Source                        |
|-----------------|--------------------------------|-------------------------------|
| <i>DED1</i>     | <i>CEN/HIS3/DED1</i>           | Chuang <i>et al.</i> , 1997   |
| pRP2044         | <i>CEN/HIS3/ded1-ΔCT</i>       | Hilliker <i>et al.</i> , 2011 |
| pSW3619         | <i>CEN/LEU2/DED1</i>           | Bolger and Wentle, 2011       |
| <i>ded1-120</i> | <i>CEN/LEU2/ded1-120</i>       | Chuang <i>et al.</i> , 1997   |
| pTB136          | <i>CEN/LEU2/ded1-ΔCT</i>       | This study                    |
| pTB111          | <i>CEN/LEU2/ded1-Δ535-548</i>  | This study                    |
| pTB112          | <i>CEN/LEU2/ded1-Δ549-562</i>  | This study                    |
| pTB113          | <i>CEN/LEU2/ded1-Δ563-576</i>  | This study                    |
| pTB114          | <i>CEN/LEU2/ded1-Δ577-590</i>  | This study                    |
| pTB115          | <i>CEN/LEU2/ded1-Δ591-604</i>  | This study                    |
| pTB123          | <i>CEN/HIS3/ded1-W604A</i>     | This study                    |
| pTB124          | <i>CEN/HIS3/ded1-W603/604A</i> | This study                    |
| pTB104          | <i>CEN/LEU2/ded1-4SA</i>       | This study                    |
| pTB122          | <i>CEN/LEU2/ded1-4SD</i>       | This study                    |
| pTB105          | <i>2μ/URA3/DED1</i>            | This study                    |
| pSW3576         | <i>pET28a-DED1</i>             | Bolger and Wentle, 2011       |
| pTB6            | <i>pET28a-ded1-Δ536-604</i>    | This study                    |
| pTB160          | <i>pET28a-ded1-Δ591-604</i>    | This study                    |
| pTB161          | <i>pET28a-ded1-W603/604A</i>   | This study                    |
